# Supplementary material for: Memory B Cells Activate Brain-Homing, Autoreactive CD4+ T Cells in Multiple Sclerosis
Source: PubMed Central journal article supplement — Cell. 2018 Sep 20;175(1):85–100.e23. doi: 10.1016/j.cell.2018.08.011 (PMC6191934; doi:10.1016/j.cell.2018.08.011), 2018-09-20
Supplement: mmc1.pdf [file mmc1.pdf]

## Supplemental Information

### **Memory B Cells Activate Brain-Homing, Autoreactive CD4<sup>+</sup> T Cells in Multiple Sclerosis**

**Ivan Jelcic, Faiez Al Nimer, Jian Wang, Verena Lentsch, Raquel Planas, Ilijas Jelcic, Aleksandar Madjovski, Sabrina Ruhrmann, Wolfgang Faigle, Katrin Frauenknecht, Clemencia Pinilla, Radleigh Santos, Christian Hammer, Yaneth Ortiz, Lennart Opitz, Hans Grönlund, Gerhard Rogler, Onur Boyman, Richard Reynolds, Andreas Lutterotti, Mohsen Khademi, Tomas Olsson, Fredrik Piehl, Mireia Sospedra, and Roland Martin**

**Table S1.** Demographic characteristics of the study population, Related to Figure 1-4, Figure 7, Figure S1-S4, Figure S7 and Table S2-S3.

| cohort          | donors       | treatment                 | n          | age<br>(mean ± SD) | age<br>(range) | F:M<br>ratio | treatment<br>duration months<br>(mean; range) | Genotype<br>(HLA/SNP) | <i>In vitro</i><br>CFSE | <i>Ex vivo</i><br>B/T cell<br>subsets | <i>In vitro</i><br>Multiplex<br>cytokine | <i>In vitro</i><br>CFSE<br>RNAseq | RASGRP2<br>reactivity |
|-----------------|--------------|---------------------------|------------|--------------------|----------------|--------------|-----------------------------------------------|-----------------------|-------------------------|---------------------------------------|------------------------------------------|-----------------------------------|-----------------------|
| 1 <sup>st</sup> | HD           | ---                       | 32         | 32.6 ± 6.8         | 25-49          | 1.7          | none                                          | HLA/SNP               | χ <sup>d</sup>          |                                       | X                                        |                                   | χ <sup>h</sup>        |
|                 | RRMS (REL)   | none/nihil <sup>+</sup>   | 18         | 33.1 ± 7.5         | 20-45          | 2.0          | none                                          | HLA                   | X                       | X                                     |                                          |                                   |                       |
|                 | RRMS (REM)   | none/nihil <sup>+</sup>   | 32         | 37.4 ± 8.1         | 22-54          | 1.1          | none                                          | HLA/SNP               | χ <sup>abcd</sup>       | X                                     | χ <sup>ac</sup>                          | χ <sup>f</sup>                    | χ <sup>h</sup>        |
|                 | Psoriasis    | none/topic*               | 10         | 34.3 ± 6.4         | 25-47          | 0.4          | none/topic*                                   |                       | X                       |                                       |                                          |                                   |                       |
|                 | Morbus Crohn | none                      | 7          | 41.3 ± 9.9         | 25-53          | 1.3          | none                                          |                       | X                       |                                       |                                          |                                   |                       |
|                 | RRMS         | rituximab                 | 14         | 47.3 ± 8.3         | 30-59          | 1.3          | 7.1; 3-21                                     |                       | X                       |                                       | X                                        |                                   |                       |
|                 | RRMS         | natalizumab               | 15         | 36.6 ± 7.7         | 23-50          | 4.0          | 17.9; 11-30                                   |                       | X                       | X                                     | X                                        |                                   |                       |
| RRMS            | fingolimod   | 10                        | 39.8 ± 7.8 | 24-47              | 1.5            | 12.7; 3-36   |                                               | X                     |                         | X                                     |                                          |                                   |                       |
| 2 <sup>nd</sup> | HD           | ---                       | 14         | 31.4 ± 4.8         | 25-41          | 0.8          | none                                          |                       | χ <sup>e</sup>          |                                       | χ <sup>e</sup>                           |                                   |                       |
|                 | RRMS (REM)   | none/nihil <sup>+</sup>   | 14         | 33.8 ± 9.5         | 22-54          | 1.8          | none                                          |                       | χ <sup>e</sup>          |                                       | χ <sup>e</sup>                           |                                   |                       |
| 3 <sup>rd</sup> | RRMS/SPMS    | before/after<br>rituximab | 179        | 42.3 ± 10.0        | 19-65          | 2.0          | 10.1; 0 and 3-29                              |                       |                         | X<br>(counts)                         |                                          |                                   |                       |
|                 | RRMS         | before/after<br>rituximab | 9          | 41 ± 6.8           | 33-54          | 3.5          | 6.2; 0 and 5-7                                |                       |                         | X<br>(frequency)                      |                                          |                                   |                       |
|                 | RRMS         | before/after<br>rituximab | 9          | 46.4 ± 9.2         | 32-59          | 0.8          | 3; 0 and 3                                    |                       | χ <sup>ac</sup>         |                                       |                                          |                                   |                       |
| 4 <sup>th</sup> | RRMS         | natalizumab               | 8          | 35.8 ± 8.4         | 24-53          | 0.6          | 20.5; 3-62                                    | HLA                   |                         |                                       |                                          |                                   | χ <sup>g</sup>        |
|                 | RRMS         | natalizumab               | 20         | 38.2 ± 8.6         | 21-56          | 0.8          | 61.3; 11-124                                  | HLA                   |                         |                                       |                                          |                                   | χ <sup>h</sup>        |

HD = healthy donors; RRMS = relapsing remitting multiple sclerosis; SPMS = secondary progressive multiple sclerosis; REL = relapse; REM = remission; nihil = untreated;

F = female; M = male; <sup>+</sup>no glucocorticoids for at least 4 weeks and no other immunomodulatory treatments for at least 12 weeks; \*only topic therapy to the skin;

<sup>a</sup>blocking; <sup>b</sup>intracellular signaling/cytokine; <sup>c</sup>B cell depletion/transfer/co-cultures; <sup>d</sup>*in vitro* CFSE<sup>dim</sup> expansion and EBV B cell transformation; <sup>e</sup>various stimulations;

<sup>f</sup>RNA sequencing of sorted CFSE<sup>dim</sup> (proliferating) and CFSE<sup>hi</sup> (resting) CD4<sup>+</sup> T and B cells upon 7-day *in vitro* autoproliiferation (only in RRMS (REM))

<sup>g</sup>RASGRP2 reactivity using thymidine incorporation assay (7 days); <sup>h</sup>RASGRP2 reactivity using Fluorospot assay (2 days)
