# Supplementary material for: Memory B Cells Activate Brain-Homing, Autoreactive CD4+ T Cells in Multiple Sclerosis
Source: PubMed Central journal article supplement — Cell. 2018 Sep 20;175(1):85–100.e23. doi: 10.1016/j.cell.2018.08.011 (PMC6191934; doi:10.1016/j.cell.2018.08.011), 2018-09-20
Supplement: mmc2.pdf [file mmc2.pdf]

**Table S2.** Association of polygenic MS risk score (non-HLA MS risk SNPs) or HLA-DR15 on autoproliiferation in HD and RRMS (REM). Linear regression was used to test for association between a polygenic MS risk score derived from 102 of MS non-HLA risk SNPs or HLA-DR15 status, respectively, and the autoproliiferation phenotype. P values and Beta coefficients describe linear regression results using a polygenic MS Risk Score (non-HLA risk SNPs) or HLA-DR15 status as independent variables, respectively, Related to Figure 1, Table S1 and Table S3.

|                 |               |               | Association with autoproliiferation (% CFSE <sup>dim</sup> ) |
|-----------------|---------------|---------------|--------------------------------------------------------------|
| HD              | MS Risk score | P             | 0.819                                                        |
|                 |               | Beta (95% CI) | 6.40 (-50.55-63.36)                                          |
|                 | HLA-DR15      | P             | 0.709                                                        |
|                 |               | Beta (95% CI) | 0.08 (-0.34-0.49)                                            |
| RRMS (REM)      | MS Risk score | P             | 0.327                                                        |
|                 |               | Beta (95% CI) | 62.83 (-66.37-192.04)                                        |
|                 | HLA-DR15      | P             | <b>0.014</b>                                                 |
|                 |               | Beta (95% CI) | <b>1.10 (0.24-1.95)</b>                                      |
| HD & RRMS (REM) | MS Risk score | P             | 0.159                                                        |
|                 |               | Beta (95% CI) | 49.82 (-20.19-119.83)                                        |
|                 | HLA-DR15      | P             | <b>0.008</b>                                                 |
|                 |               | Beta (95% CI) | <b>0.69 (0.19-1.19)</b>                                      |

*HD = healthy donors; RRMS = relapsing remitting multiple sclerosis; REM = remission; CFSE<sup>dim</sup> = percentage of autoproliiferating cells; Beta = beta coefficients from linear regression; P = P values from linear regression*
