# Supplementary material for: Memory B Cells Activate Brain-Homing, Autoreactive CD4+ T Cells in Multiple Sclerosis
Source: PubMed Central journal article supplement — Cell. 2018 Sep 20;175(1):85–100.e23. doi: 10.1016/j.cell.2018.08.011 (PMC6191934; doi:10.1016/j.cell.2018.08.011), 2018-09-20
Supplement: mmc4.pdf [file mmc4.pdf]

**Table S4.** Overview of TCRV $\beta$  sequencing results in brain and peripheral blood compartment.

Details of input samples and TCRV $\beta$  sequencing results from sorted peripheral blood compartments (CFSE<sup>hi</sup> and CFSE<sup>dim</sup>) at day 7 of CFSE assay as well as brain lesions and brain infiltrates from two different MS patients. Frequency and counts of TCRV $\beta$  sequences were only related and calculated according to productive sequences (in frame sequences). Irrelevant sequences such as unproductive sequences and sequences with CDR3 regions of less than four amino acids were excluded from analysis. The two independent experiments for MS patient 1 are indicated by (A) and (B), Related to Figure 5-6, Figure S5-S6 and Table S5.

| patient | sample                                        | characteristics<br>(sorted cell number)  | TCRseq<br>method | productive TCRV $\beta$<br>sequences |                           | productive unique TCRV $\beta$<br>sequences |                                                         |
|---------|-----------------------------------------------|------------------------------------------|------------------|--------------------------------------|---------------------------|---------------------------------------------|---------------------------------------------------------|
|         |                                               |                                          |                  | nucleotide<br>(total)                | nucleotide<br>(frequency) | common<br>nucleotide<br>(total)             | common<br>CDR3 amino acid,<br>V-gene, J-gene<br>(total) |
| 1 (A)   | PBMC<br>CFSE <sup>dim</sup> 7AAD <sup>-</sup> | proliferating<br>(20.000 cells)          | survey<br>DNA    | 6377                                 | 34.73%                    | 117                                         | 114                                                     |
| 1 (B)   | PBMC<br>CFSE <sup>dim</sup> 7AAD <sup>-</sup> | proliferating<br>(20.000 cells)          | survey<br>DNA    | 27059                                | 64.35%                    | 406                                         | 391                                                     |
| 1 (A)   | PBMC<br>CFSE <sup>hi</sup> 7AAD <sup>-</sup>  | non-proliferating<br>(500.000 cells)     | deep<br>DNA      | 946304                               | 80.30%                    | 41274                                       | 38994                                                   |
| 1 (B)   | PBMC<br>CFSE <sup>hi</sup> 7AAD <sup>-</sup>  | non-proliferating<br>(500.000 cells)     | deep<br>DNA      | 433206                               | 79.59%                    | 15230                                       | 14465                                                   |
| 1       | brain lesion<br>LI                            | tissue,<br>late/low active lesion        | survey<br>DNA    | 141078                               | 81.49%                    | 1111                                        | 1062                                                    |
| 1       | brain lesion LIII                             | tissue,<br>early/high active<br>lesion   | survey<br>DNA    | 50522                                | 65.90%                    | 296                                         | 271                                                     |
| 1       | brain lesion<br>LIV                           | tissue,<br>early/medium active<br>lesion | survey<br>DNA    | 128655                               | 74.57%                    | 796                                         | 698                                                     |
| 2       | PBMC<br>CFSE <sup>dim</sup> 7AAD <sup>-</sup> | proliferating<br>(20.000 cells)          | survey<br>DNA    | 45303                                | 67.84%                    | 513                                         | 492                                                     |
| 2       | PBMC<br>CFSE <sup>hi</sup> 7AAD <sup>-</sup>  | non-proliferating<br>(500.000 cells)     | deep<br>DNA      | 1409991                              | 83.47%                    | 60442                                       | 56362                                                   |
| 2       | brain-infiltrating<br>cells                   | isolated brain-<br>infiltrating cells    | survey<br>DNA    | 80347                                | 76.05%                    | 881                                         | 851                                                     |
